# Supplementary material
Source: Springer Nature journal article supplement (https://www.springermedizin.de/resource/supplementary/12970_2009_156_MOESM3_ESM.pdf/9594554)

**Soleus glycogen content  
mg/100mg wet tissue**

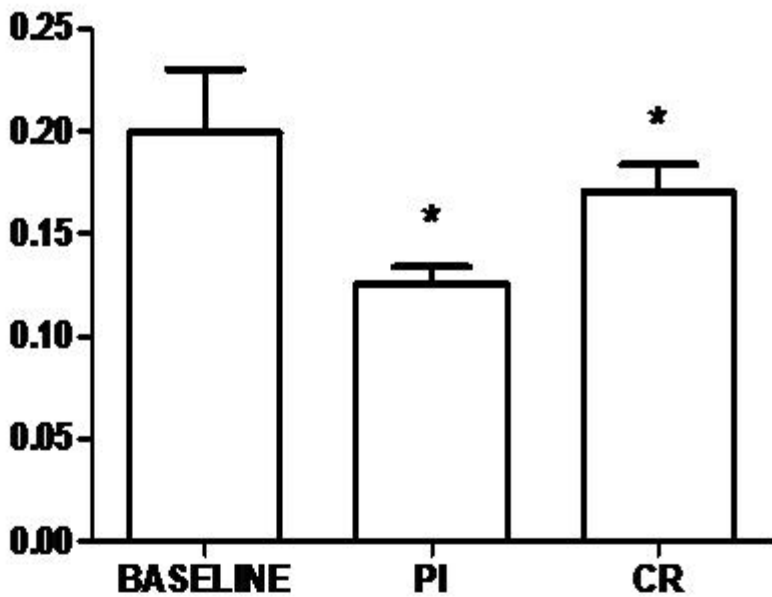

Supplement: MOESM3 [file 9594554]
